# Supplementary material for: Total Polyphenol Content in Food Samples and Nutraceuticals: Antioxidant Indices versus High Performance Liquid Chromatography
Source: MDPI journal article supplement (doi:10.3390/antiox11020324), 2022-02-07
Supplement: s1 [file s1]

# Total Polyphenol Content in Food Samples and Nutraceuticals: Antioxidant Indices versus High Performance Liquid Chromatography

Oscar Vidal-Casanella<sup>1</sup>, Javier Moreno-Merchan<sup>1</sup>, Merce Granados<sup>1</sup>, Oscar Nuñez<sup>1,2</sup>, Javier Saurina<sup>1,2,\*</sup>, Sonia Sentellas<sup>1,2,3</sup>

<sup>1</sup> Department of Chemical Engineering and Analytical Chemistry, University of Barcelona. Martí i Franquès, 1-11, E-08028 Barcelona, Spain.

<sup>2</sup> Research Institute in Food Nutrition and Food Safety, University of Barcelona, Recinte Torribera, Av. Prat de la Riba 171, Edifici de Recerca (Gaudí), E-08921 Santa Coloma de Gramenet, Barcelona, Spain.

<sup>3</sup> Serra Hünter Fellow, Generalitat de Catalunya, Spain.

\* xavi.saurina@ub.edu

**Table S1.** List of samples analyzed and their characteristics.

| Sample type                                                       | Identification code and composition |                                                                                                                                              |
|-------------------------------------------------------------------|-------------------------------------|----------------------------------------------------------------------------------------------------------------------------------------------|
| Cranberry<br>(Gelatin capsule)                                    | EC1                                 | <i>Vaccinium macrocarpon</i>                                                                                                                 |
|                                                                   | EC2                                 |                                                                                                                                              |
|                                                                   | EC3                                 |                                                                                                                                              |
|                                                                   | C02                                 |                                                                                                                                              |
| Cranberry with others<br>(Gelatin capsule)                        | C04                                 | <i>Vaccinium macrocarpon</i> , <i>Urtica urens</i>                                                                                           |
|                                                                   | C05                                 | <i>Vaccinium macrocarpon</i> , <i>Solidago virgaurea</i> , vitamin D                                                                         |
| Raspberry<br>(gragea)                                             | C17                                 | <i>Rubus idaeus</i> , <i>Mangillera Indica</i> , <i>Camellia sinensis</i> , <i>Paullina cupana</i> , <i>Euterpe olercarcea</i> , L-carnitine |
|                                                                   | C18                                 | <i>Rubus idaeus</i> , <i>Camellia sinensis</i>                                                                                               |
|                                                                   | C19                                 | <i>Rubus idaeus</i> , <i>Camellia sinensis</i>                                                                                               |
| Black grape (seeds)<br>(Gelatin capsule)                          | C20                                 | <i>Vitis vinifera</i> (seeds)                                                                                                                |
| Black grape (peel) with others and grapevine<br>(Gelatin capsule) | C21                                 | <i>Vitis vinifera</i> (peel),<br><i>Allium cepa</i> ,<br><i>Polygonum cuspidatum</i>                                                         |
|                                                                   | C22                                 | <i>Vitis vinifera</i> (peel),<br><i>Punica granatum</i>                                                                                      |
|                                                                   | C23                                 | <i>Vitis vinifera</i><br>(leaves extract)                                                                                                    |
| Artichoke<br>(Gelatin capsule)                                    | C25                                 | <i>Cynara scolymus</i>                                                                                                                       |
|                                                                   | C26                                 |                                                                                                                                              |
| Turmeric<br>(powdered root)                                       | T1                                  | <i>Curcuma longa</i> (Alleppey)                                                                                                              |
|                                                                   | T2                                  | <i>Curcuma longa</i> (Erode)                                                                                                                 |
|                                                                   | T3                                  |                                                                                                                                              |

|                                       |     |                                                                                |
|---------------------------------------|-----|--------------------------------------------------------------------------------|
|                                       | T4  | <i>Curcuma longa</i> (Madras)                                                  |
|                                       | T5  | <i>Curcuma zedoaria</i>                                                        |
| <b>Curry</b><br>(commercial species)  | CY1 | Turmeric, pepper, coriander, cumin, fenugreek, parsley, chili, garlic, fennel  |
|                                       | CY2 | Turmeric, pepper, coriander, ginger, cumin, fenugreek, laurel, fennel, mustard |
|                                       | CY3 | Turmeric, pepper, coriander, fennel, cumin, cayenne, garlic, anise             |
| <b>Coffee</b><br>(grounded)           | CO1 | Coffee <i>Robusta</i>                                                          |
|                                       | CO2 | Coffee <i>Arabica</i>                                                          |
|                                       | CO3 |                                                                                |
|                                       | CO4 | Coffee <i>Robusta</i>                                                          |
|                                       | CO5 |                                                                                |
|                                       | CO6 | Coffee <i>Arabica-Robusta</i>                                                  |
| <b>Pepper</b><br>(commercial species) | P1  | Hot pepper (PDO de la Vera)                                                    |
|                                       | P2  | Hot pepper (PDO Murcia)                                                        |
|                                       | P3  | Hot Pepper (PDO Mallorca)                                                      |
| <b>Tea</b><br>(commercial product)    | Te1 | Green tea                                                                      |
|                                       | Te2 | Red tea with anise                                                             |
|                                       | Te3 | White tea with vanilla                                                         |
| <b>Juice</b>                          | J1  | Peach                                                                          |
|                                       | J2  | Pineapple                                                                      |
|                                       | J3  | tomato                                                                         |
|                                       | J4  | Apple                                                                          |
|                                       | J5  | Pear                                                                           |
| <b>Wine</b>                           | W1  | white wine (PDO Gandesá)                                                       |
|                                       | W2  | red wine (PDO Priorat)                                                         |
| <b>Beer</b>                           | B1  | Lager                                                                          |
|                                       | B2  | Lager                                                                          |
|                                       | B3  | India Pale Ale                                                                 |
| <b>Sparkling wine</b>                 | S1  | White (grape variety: Macabeu, Xarel·lo and Parellada)                         |
|                                       | S2  | Rosé (grape variety: Pinord noir and Chardonnay)                               |
|                                       | S3  | White (grape variety: Macabeu, Xarel·lo and Parellada)                         |
|                                       | S4  | White (grape variety: Macabeu, Xarel·lo and Parellada)                         |
|                                       | S5  | Rosé (grape variety: Pinord noir and Chardonnay)                               |
| <b>Chocolate</b>                      | CH1 | dark (cocoa content, 100%)                                                     |
|                                       | CH2 | dark (cocoa content, 99%)                                                      |
|                                       | CH3 | dark (cocoa content, 85%)                                                      |

Table S2. MRM transitions for the detection of polyphenols by LC-ESI-MS/MS.

| Polyphenol                | Parent ion<br>( <i>m/z</i> ) | Daughter<br>ion<br>( <i>m/z</i> ) | DP (V) | CE (V) | CXP (V) |
|---------------------------|------------------------------|-----------------------------------|--------|--------|---------|
| Gallic acid               | 169.0                        | 124.9                             | -40    | -22    | -19     |
| Caffeic acid              | 178.9                        | 134.8                             | -45    | -20    | -1      |
| Quercetin                 | 300.9                        | 150.8                             | -80    | -32    | -1      |
| Hesperidin                | 609.3                        | 301.2                             | -115   | -36    | -19     |
| Resveratrol               | 226.8                        | 143.3                             | -70    | -34    | -1      |
| Ferulic acid              | 192.6                        | 134.3                             | -30    | -22    | -1      |
| Vanillic acid             | 166.9                        | 151.8                             | -65    | -20    | -1      |
| Ethyl gallate             | 197.2                        | 123.8                             | -60    | -34    | -3      |
| Ellagic acid              | 300.8                        | 284.0                             | -95    | -98    | -1      |
| Catechin                  | 289.1                        | 109.2                             | -110   | -42    | -19     |
| Epicatechin               | 288.7                        | 124.9                             | -85    | -33    | -7      |
| Epigallocatechin          | 304.9                        | 125.0                             | -80    | -26    | -25     |
| p-Coumaric acid           | 163.0                        | 119.3                             | -60    | -18    | -1      |
| Rutin                     | 609.2                        | 299.6                             | -95    | -48    | -23     |
| Myricetin                 | 316.9                        | 150.8                             | -95    | -40    | -9      |
| Syringic acid             | 196.9                        | 120.9                             | -40    | -26    | -9      |
| Astilbin                  | 449.1                        | 285.0                             | -100   | -32    | -1      |
| Trans-Coutaric acid       | 295.0                        | 162.9                             | -30    | -20    | -11     |
| Caftaric acid             | 311.1                        | 179.0                             | -50    | -22    | -11     |
| Diosmin                   | 607.3                        | 299.1                             | -105   | -34    | -23     |
| Hesperetin                | 301.0                        | 286.1                             | -105   | -36    | -5      |
| Naringin                  | 579.3                        | 271.0                             | -140   | -36    | -5      |
| Naringenin                | 271.0                        | 150.8                             | -90    | -32    | -25     |
| Catechol                  | 109.1                        | 90.9                              | -25    | -26    | -5      |
| 4-hydroxybenzoic acid     | 136.8                        | 92.9                              | -55    | -18    | -7      |
| Vanillin                  | 150.9                        | 135.9                             | -50    | -14    | -31     |
| Chlorogenic acid          | 352.9                        | 190.6                             | -60    | -20    | -17     |
| 3-methylcatechol          | 122.9                        | 108.0                             | -50    | -22    | -13     |
| 4-ethylcatechol           | 136.9                        | 122.0                             | -80    | -22    | -5      |
| 2,5-dihydroxybenzoic acid | 152.8                        | 108.0                             | -50    | -18    | -15     |
| 4-methylcatechol          | 122.9                        | 108.1                             | -75    | -22    | -7      |
| 3,4-dihydroxibenzoic acid | 152.9                        | 108.9                             | -70    | -20    | -3      |
| Procyanidin A2            | 575.2                        | 285.2                             | -135   | -38    | -1      |
| Procyanidin B2            | 577.1                        | 407.1                             | -5     | -26    | -11     |
| Procyanidin C1            | 865.3                        | 125.1                             | -180   | -86    | -7      |

DP: declustering potential, CE: collision energy, CXP: collision cell exit potential.

**Table S3.** Principal polyphenols identified in the different types of samples.

| Sample type | Main polyphenol(s)                                                                                                                                                                                                                                         | Other minor polyphenols                                                                                                                                                  |
|-------------|------------------------------------------------------------------------------------------------------------------------------------------------------------------------------------------------------------------------------------------------------------|--------------------------------------------------------------------------------------------------------------------------------------------------------------------------|
| Cranberry   | 3,4-dihydroxybenzoic acid; p-coumaric acid; vanillic acid; gallic acid; caffeic acid; ferulic acid; epicatechin; catechin; quercetin; myricetin; chlorogenic acid; procyanidin B1; procyanidin A2; procyanidin C1                                          | 4-hydroxybenzoic acid; 2,5-dihydroxybenzoic acid; vanillin; syringic acid; epigallocatechin                                                                              |
| Raspberry   | gallic acid; caffeic acid; epicatechin; catechin; quercetin; epigallocatechin                                                                                                                                                                              | 3,4-dihydroxybenzoic acid; vanillic acid; ferulic acid; chlorogenic acid; rutin; hesperitin                                                                              |
| Grape       | 4-hydroxybenzoic acid; 2,5-dihydroxybenzoic acid; 3,4-dihydroxybenzoic acid; p-coumaric acid; vanillic acid; gallic acid; caffeic acid; ferulic acid; resveratrol; epicatechin; catechin; quercetin; caftaric acid; coutaric acid; stilbin; diosmin; rutin | catechol; 3-methylcatechol; 4-methylcatechol; vanillin; syringic acid; ethyl gallate; naringenin; myricetin; hesperitin                                                  |
| Grapevine   | 4-hydroxybenzoic acid; 3,4-dihydroxybenzoic acid; p-coumaric acid; vanillic acid; gallic acid; caffeic acid; ferulic acid; caftaric acid; coutaric acid; quercetin; rutin; hesperitin                                                                      | catechol; 3-methylcatechol; 4-methylcatechol; 2,5-dihydroxybenzoic acid; syringic acid; resveratrol; epicatechin; catechin; epigallocatechin myricetin; stilbin; diosmin |
| Turmeric    | 4-hydroxybenzoic acid; vanillin; p-coumaric acid; vanillic acid; caffeic acid; ferulic acid; curcumin; demethoxycurcumin; bisdemethoxycurcumin                                                                                                             | 3-methylcatechol; 4-methylcatechol; 3,4-dihydroxybenzoic acid; gallic acid;                                                                                              |
| Coffee      | 3,4-dihydroxybenzoic acid; caffeic acid; ferulic acid; chlorogenic acid                                                                                                                                                                                    | catechol; ethyl catechol; coumaric acid; vanillic acid; gallic acid                                                                                                      |
| Pepper      | 4-hydroxybenzoic acid; 3,4-dihydroxybenzoic acid; p-coumaric acid; caffeic acid; ferulic acid; quercetin; chlorogenic acid; rutin; hesperitin                                                                                                              | catechol; ethyl catechol; 3-methylcatechol; 4-methylcatechol; 2,5-dihydroxybenzoic acid; vanillic acid; gallic acid; syringic acid, stilbin                              |
| Tea         | 4-hydroxybenzoic acid; 3,4-dihydroxybenzoic acid; p-coumaric acid; gallic acid; caffeic acid; ferulic acid; epicatechin; catechin; epigallocatechin; quercetin; myricetin; chlorogenic acid; rutin; hesperitin                                             | 2,5-dihydroxybenzoic acid; vanillic acid; naringenin; naringin                                                                                                           |
| Beer        | caffeic acid                                                                                                                                                                                                                                               | 4-hydroxybenzoic acid; 3,4-dihydroxybenzoic acid; p-coumaric acid; vanillic acid; ferulic acid; ethyl gallate; naringin                                                  |

|           |                                                                                                                                                                                                                            |                                                                                                  |
|-----------|----------------------------------------------------------------------------------------------------------------------------------------------------------------------------------------------------------------------------|--------------------------------------------------------------------------------------------------|
| Red wine  | 4-hydroxybenzoic acid; 3,4-dihydroxybenzoic acid; p-coumaric acid; vanillic acid; gallic acid; caffeic acid; ferulic acid; ethyl gallate; resveratrol; epicatechin; catechin; coumaric acid; quercetin; myricetin; stilbin | 3-methylcatechol; 4-methylcatechol; 2,5-dihydroxybenzoic acid; syringic acid; epigallocatechin;  |
| Chocolate | 3,4-dihydroxybenzoic acid; caffeic acid; epicatechin; procyanidin B2                                                                                                                                                       | 4-hydroxybenzoic acid; p-coumaric acid; vanillic acid; gallic acid; catechin; quercetin; stilbin |
| Artichoke | 3,4-dihydroxybenzoic acid; p-coumaric acid; vanillic acid; gallic acid; caffeic acid; ferulic acid; chlorogenic acid; stilbin                                                                                              | 4-hydroxybenzoic acid; 2,5-dihydroxybenzoic acid; syringic acid; coumaric acid; diosmin          |

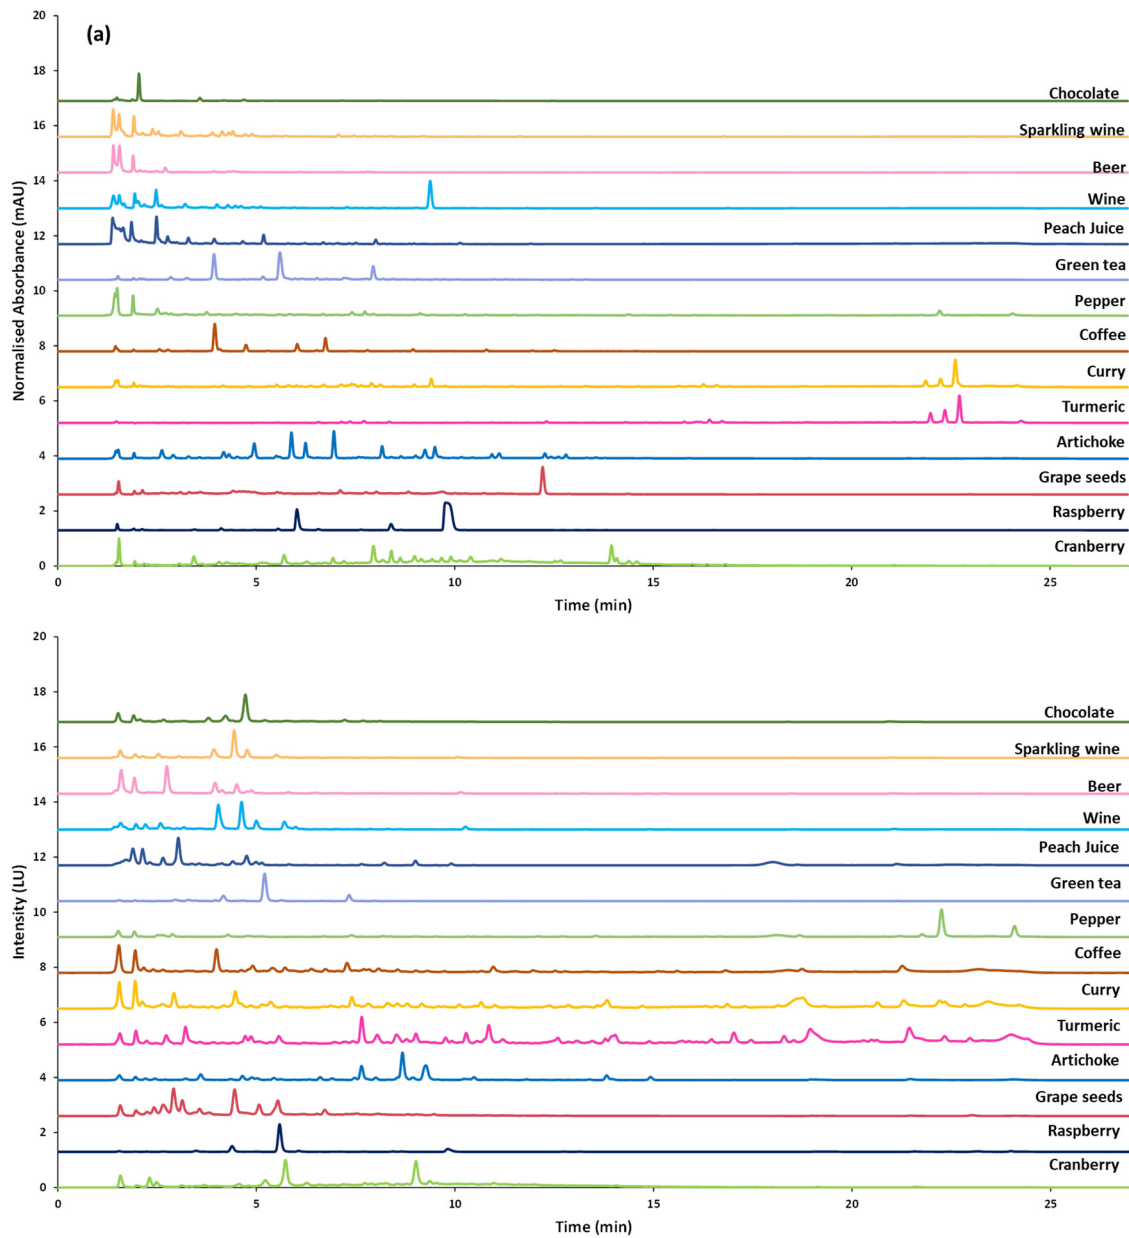

**Figure S1.** Chromatographic profiles of a representative sample of each type: a) UV ( $\lambda=280$  nm); b) FLD ( $\lambda_{ex}=280$  nm,  $\lambda_{em}=330$  nm).

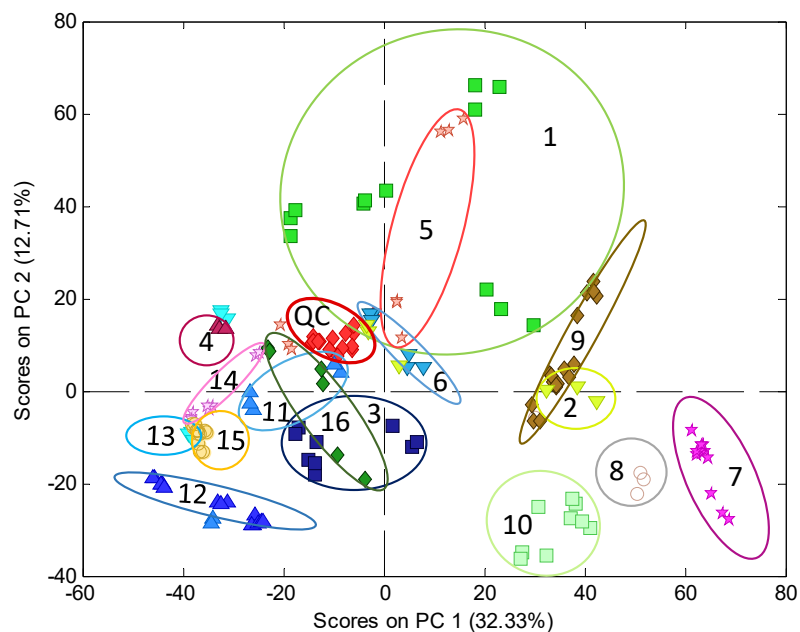

**Figure S2.** Characterization of nutraceuticals, foods and beverages by PCA using the chromatographic fingerprints by FLD at 280 and 330 nm as the excitation and emission wavelengths in the time range 1.22 to 25.19 min as the data. Scatter plot of scores of PC1 vs PC2. Classes identification: 1 = Cranberry; 2 = Cranberry with others; 3 = Raspberry; 4 = Black grape (seeds); 5 = Black grape (peel) with others and grapevine; 6 = Artichoke; 7 = Turmeric; 8 = Curry; 9 = Coffee; 10 = Pepper; 11 = Tea; 12 = Juice; 13 = Wine; 14 = Beer; 15 = Sparkling wine; 16 = Chocolate.

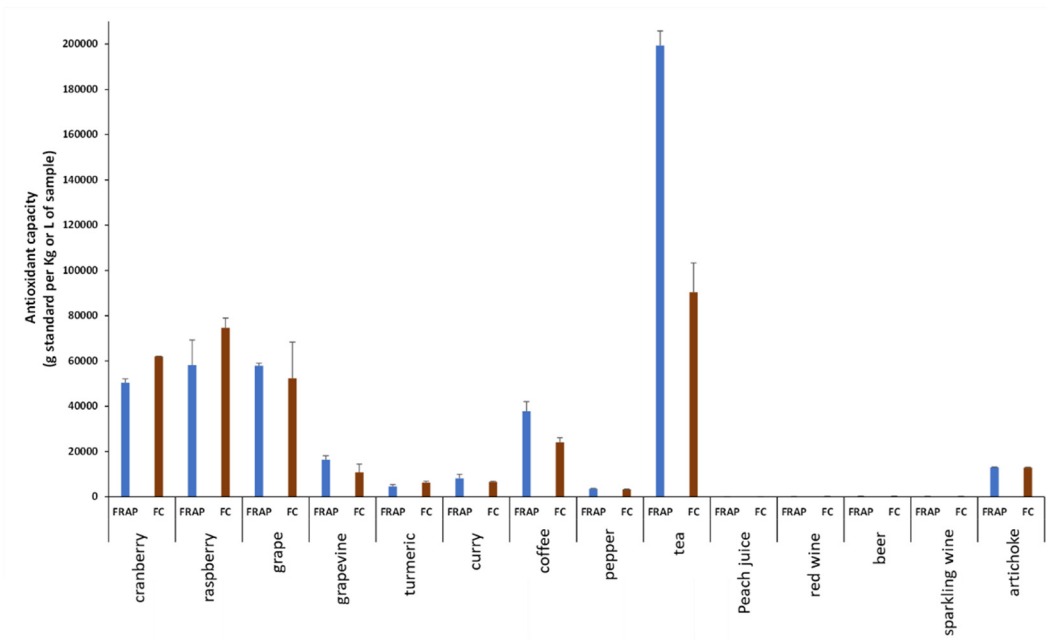

**Figure S3.** Determination of antioxidant capacity by FC and FRAP indexes as acid gallic or Trolox equivalents, respectively, on different samples classes. Error bars indicate the standard deviation from 3 independent replicates.



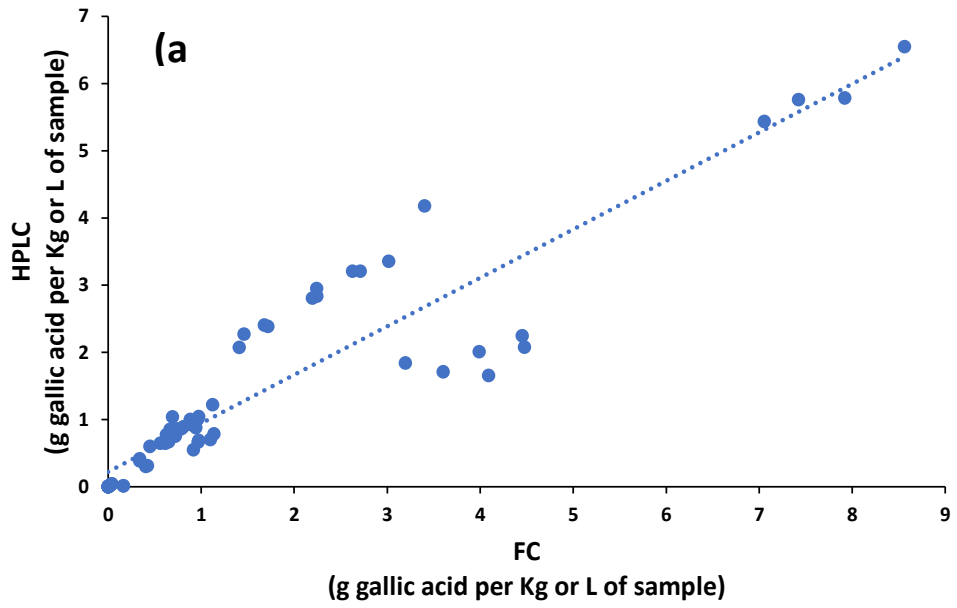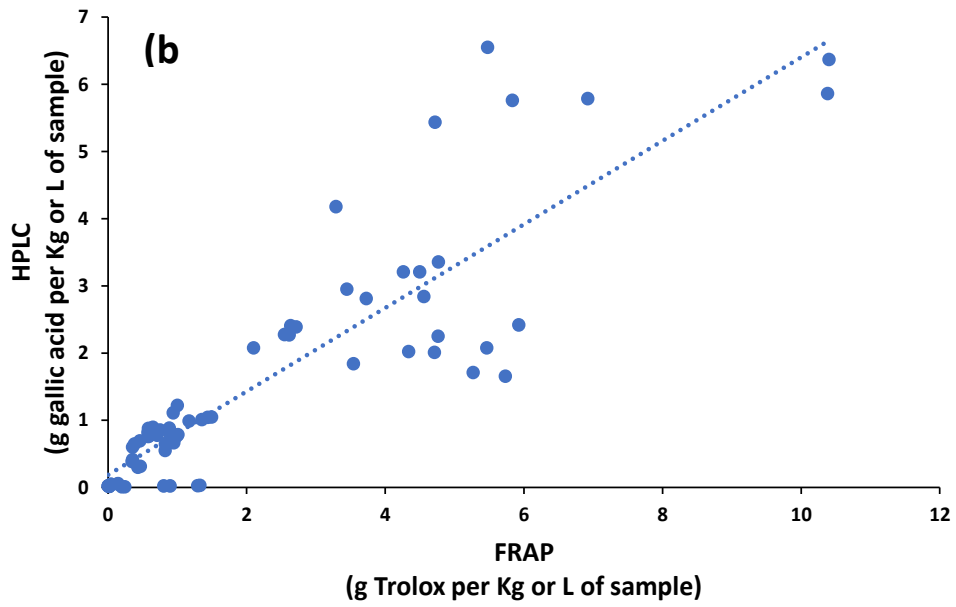

Figure S4. Correlation studies: a) FRAP versus HPLC-UV; b) FC versus HPLC-UV.

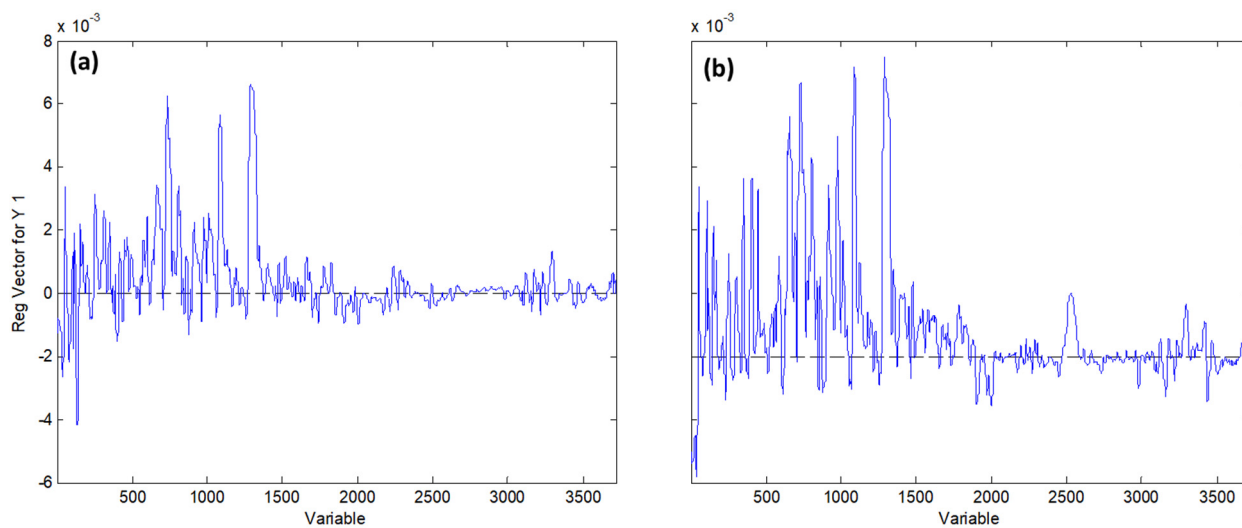

**Figure S5.** Regression vector for the prediction of the antioxidant index vs variables (chromatographic range): a) FC; b) FRAP.
